# Supplementary material for: Woven electrochemical fabric-based test sensors (WEFTS): a new class of multiplexed electrochemical sensors
Source: Royal Society of Chemistry journal article supplement (doi:10.1039/c5lc00041f), 2015-01-01
Supplement: c5lc00041f2.pdf [file c5lc00041f2.pdf]

S1: Supplementary Information for the paper titled "Woven Electrochemical Fabric-based Test Sensors (WEFTS): A new class of multiplexed electrochemical sensors"

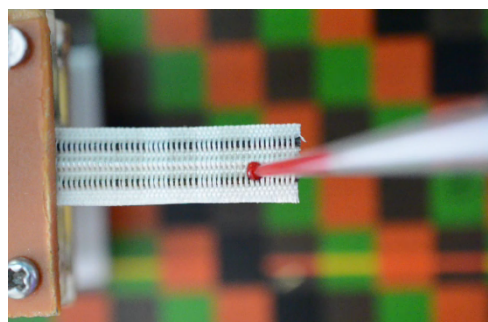

$t = 0s$

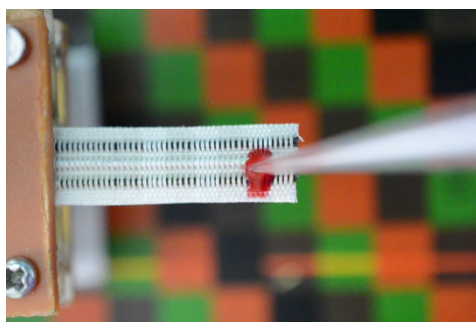

$t = 1s$

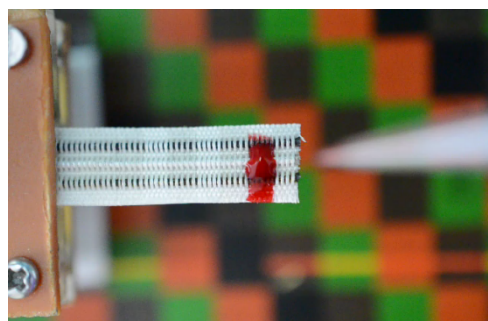

$t = 2s$

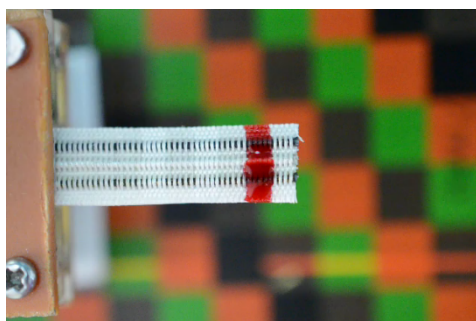

$t = 3s$

**Fig. 1: Photographs showing spreading of blood sample on glucose sensor strips. The sample is added at  $t = 0s$  and starts wicking immediately. Within 3s, the entire strip is covered with blood sample. Amperometric current from the sensor is only measured at 8s when blood is assumed to have wicked the entire strip length.**

S1: Supplementary Information for the paper titled "Woven Electrochemical Fabric-based Test Sensors (WEFTS): A new class of multiplexed electrochemical sensors"

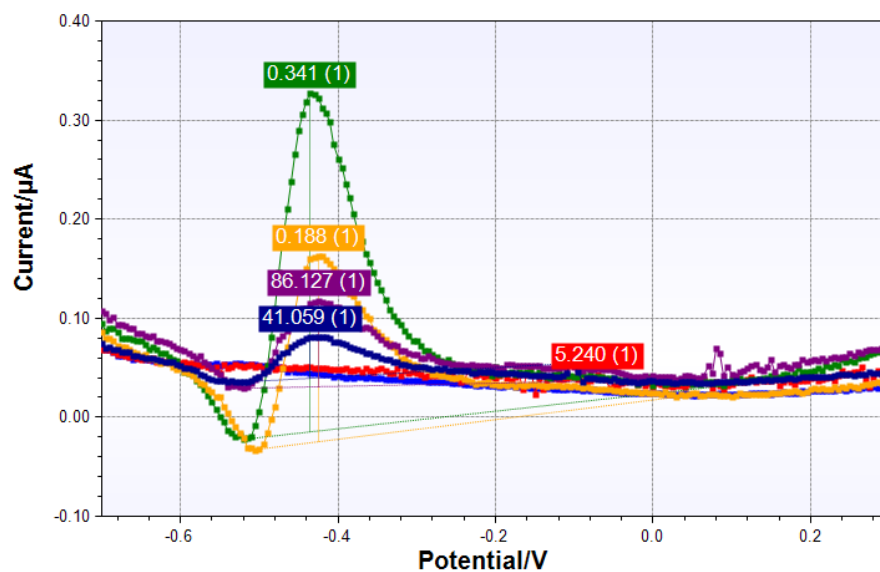

Figure 2. Snapshot of original curves used in the figure 5b in the paper with automatically generated peak current value

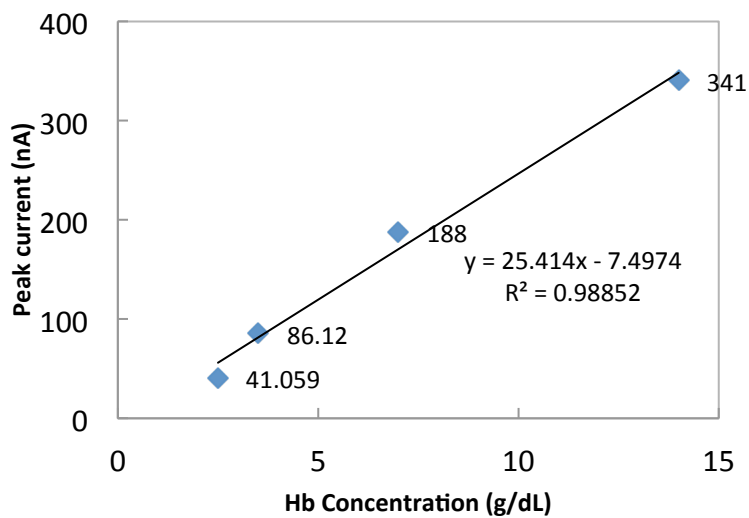

Figure 3 b: Linearity of hemoglobin detection generated from figure 5b (In paper)
